# Supplementary material for: Whole-genome sequencing of Atacama skeleton shows novel mutations linked with dysplasia
Source: PubMed Central journal article supplement (PMC5880234; doi:10.1101/gr.223693.117), 2018-04
Supplement: supp_gr.223693.117_Supplemental_Fig_S5.pdf [file supp_gr.223693.117_Supplemental_Fig_S5.pdf]

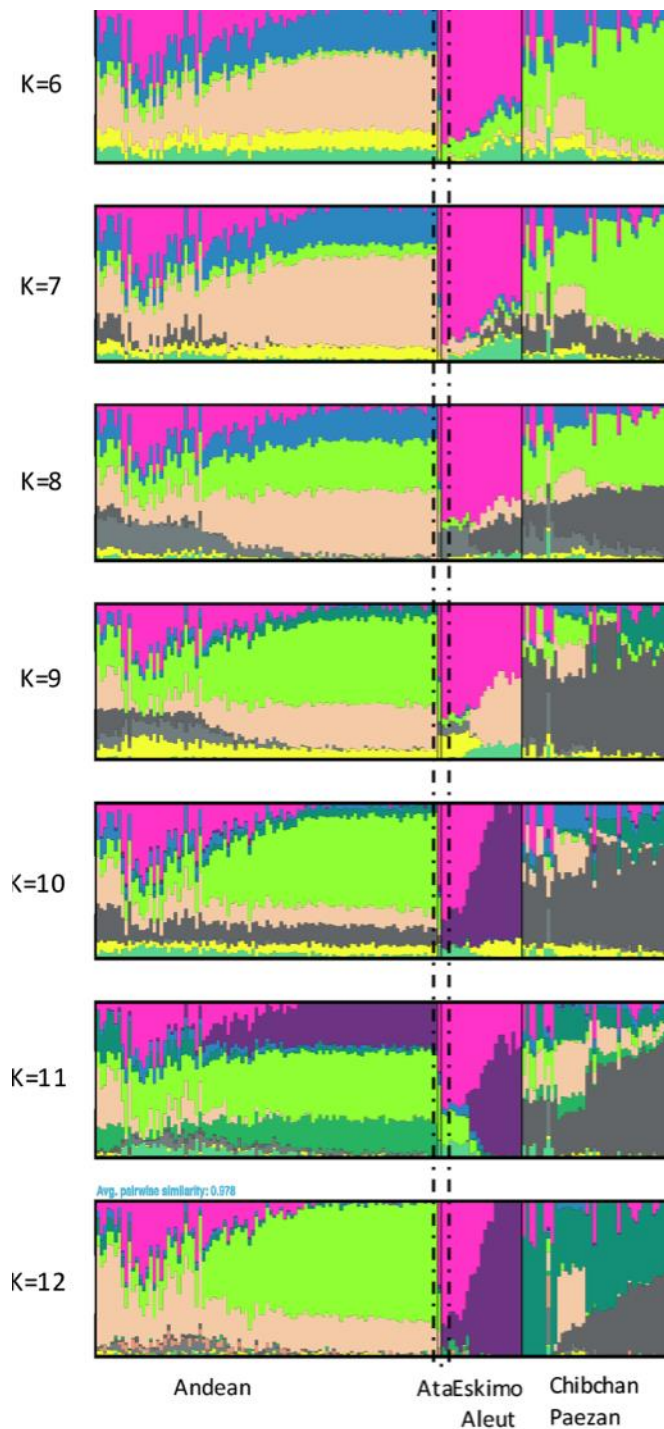

Supplemental Fig S5. ADMIXTURE analyses (K=6 through 10) for local ancestry estimation of Ata mapped on the unmasked 52 Native American populations dataset. This plot depicts the fractional memberships of Ata in reference to Native American populations (Andean and Eskimo-Aleut and Chibchan Paezan population) with average pairwise similarity =0.978 across ten replicate runs at K=12.
